# Supplementary material
Source: PubMed Central journal article supplement (PMC7218424)
Supplement: advancesADV2019001384-suppl1.pdf [file advancesADV2019001384-suppl1.pdf]

**Supplementary Tables:**

**Sickle Cell Disease:**

| Clinical Diagnosis                                                                                          | ICD-9-CM                                           | ICD-10-CM                                                         |
|-------------------------------------------------------------------------------------------------------------|----------------------------------------------------|-------------------------------------------------------------------|
| Sickle Cell<br>Thalassemia                                                                                  | 282.41 Sickle-cell crisis                          | D57.40 Sickle-cell thalassemia without crisis                     |
|                                                                                                             | 282.42 Sickle-cell<br>thalassemia with crisis      | D57.411 Sickle-cell thalassemia with acute chest syndrome         |
|                                                                                                             |                                                    | D57.412 Sickle-cell thalassemia with acute chest syndrome         |
|                                                                                                             |                                                    | D57.419 Sickle-cell thalassemia with crisis, unspecified          |
| Hb-SS                                                                                                       | 282.61 Hb-SS disease<br>without crisis             | (EXCLUDED) D57.1 Sickle-cell disease without crisis               |
|                                                                                                             | 282.62 Hb-SS disease with<br>crisis                | D57.00 Hb-SS disease with crisis, unspecified                     |
|                                                                                                             |                                                    | D57.01 Hb-SS disease with acute chest syndrome                    |
|                                                                                                             |                                                    | D57.02 Hb-SS disease with splenic sequestration                   |
| Hb-SC                                                                                                       | 282.63 Sickle-cell/Hb-C<br>disease without crisis  | D57.20 Sickle-cell/Hb-C disease without crisis                    |
|                                                                                                             | 282.64 Sickle-cell/Hb-C<br>disease with crisis     | D57.211 Sickle-cell/Hb-C disease with acute chest<br>syndrome     |
|                                                                                                             |                                                    | D57.212 Sickle-cell/Hb-C disease with splenic<br>sequestration    |
|                                                                                                             |                                                    | D57.219 Sickle-cell/Hb-C disease with crisis, unspecified         |
| Other abnormal<br>hemoglobin<br>(Hb-D) (Hb-E) (Hb-G)<br>(Hb-J) (Hb-K) (Hb-O)<br>(Hb-P) (high fetal<br>gene) | 282.68 Other sickle-cell<br>disease without crisis | D57.80 Other sickle-cell disorders without crisis                 |
|                                                                                                             | 282.69 Other sickle-cell<br>disease with crisis    | D57.811 Other sickle-cell disorders with acute chest<br>syndrome  |
|                                                                                                             |                                                    | D57.812 Other sickle-cell disorders with splenic<br>sequestration |
|                                                                                                             |                                                    | D57.819 Other sickle-cell disorders with crisis, unspecified      |

**Venous Thromboembolism:**

| Clinical Diagnosis     | ICD-9-CM                                        | ICD-10-CM                                                      |
|------------------------|-------------------------------------------------|----------------------------------------------------------------|
| Deep Venous Thrombosis | <u>453</u> Other venous embolism and thrombosis | <u>I82</u> Other venous embolism and thrombosis                |
| Pulmonary Embolism     | <u>415.1</u> Pulmonary embolism and infarction  | <u>I26</u> Pulmonary embolism                                  |
| Portal Vein Thrombosis | <u>452</u> Portal vein thrombosis               | <u>I81</u> Portal vein thrombosis                              |
| Intracardiac thrombus  | <u>429.89</u> Other ill-defined heart diseases  | <u>I51.3</u> Intracardiac thrombosis, not elsewhere classified |

**Arterial Thromboembolism:**

| Clinical Diagnosis            | ICD-9-CM                                                  | ICD-10-CM                                                                                                                      |
|-------------------------------|-----------------------------------------------------------|--------------------------------------------------------------------------------------------------------------------------------|
| CVA                           | <u>434</u> Occlusion of cerebral arteries                 | <u>I63</u> Cerebral infarction<br><u>I66</u> Occlusion and stenosis of cerebral arteries, not resulting in cerebral infarction |
|                               | <u>433</u> Occlusion and stenosis of precerebral arteries | <u>I65</u> Occlusion and stenosis of precerebral arteries, not resulting in cerebral infarction                                |
| Colonic ischemia              | <u>557</u> Vascular insufficiency of intestine            | <u>K55.0</u> Acute vascular disorders of intestine                                                                             |
| eye                           | <u>362.3</u> Retinal vascular occlusion                   | <u>H34</u> Retinal vascular occlusions                                                                                         |
| kidney                        | <u>593.81</u> Vascular disorders of kidney                | <u>N28.0</u> Ischemia and infarction of kidney                                                                                 |
| Aorta and peripheral arteries | <u>444</u> Arterial embolism and thrombosis               | <u>I74</u> Arterial embolism and thrombosis                                                                                    |

**Pregnancy:**

| Clinical Diagnosis   | ICD-9-CM                            | ICD-10-CM                                                    |
|----------------------|-------------------------------------|--------------------------------------------------------------|
| Outcome of delivery  | <u>V27</u> Outcome of delivery      | <u>Z37</u> Outcome of delivery                               |
| Spontaneous Abortion | <u>633</u> Ectopic pregnancy        | <u>O00</u> Ectopic pregnancy                                 |
|                      | <u>634</u> Spontaneous abortion     | <u>O03</u> Spontaneous abortion                              |
| Abortion             | <u>632</u> Missed abortion          | <u>O02.1</u> Missed abortion                                 |
|                      | <u>635</u> Legally induced abortion | <u>Z33.2</u> Encounter for elective termination of pregnancy |
|                      | <u>636</u> Illegal abortion         |                                                              |
|                      | <u>637</u> Unspecified abortion     |                                                              |

**Procedure Queries:**

| Procedure                                                              | ICD-9-PCS                                                                          | ICD-10-PCS                                                                                                                                                            |
|------------------------------------------------------------------------|------------------------------------------------------------------------------------|-----------------------------------------------------------------------------------------------------------------------------------------------------------------------|
| Central Venous Catheter Placement (Peripherally or Centrally inserted) | 38.93 Venous catheterization, not elsewhere classified                             | 02HV33Z Insertion of infusion device into superior vena cava, percutaneous approach                                                                                   |
|                                                                        |                                                                                    | 06HM33Z Insertion of Infusion Device into Right Femoral Vein, Percutaneous Approach                                                                                   |
| Tunneled Dialysis Catheter Placement                                   | 38.95 for venous catheterization for renal dialysis                                | 02HV33Z (infusion device)<br>0JH63XZ (vascular access device, tunneled)                                                                                               |
| Total Knee Arthroplasty                                                | 81.54 Total knee replacement                                                       | 0SRD0xx - Replacement of Left Knee Joint<br>0SRC0xx - Replacement of Right Knee Joint                                                                                 |
| Removal of Prosthesis Knee                                             | 80.06 Removal of Prosthesis Knee                                                   | 0SPD0xx - Right Knee<br>0SPC0xx - Left Knee                                                                                                                           |
| Revision Knee Replacement                                              | 81.55 Revision total knee replacement                                              | 0SWC0xx - Revision of synthetic substitute Right Knee joint<br>0SWD0xx - Revision of synthetic substitute Left Knee Joint                                             |
| Knee Arthroscopy                                                       | 80.26 Arthroscopy, Knee                                                            | 0SxC4ZZ Arthroscopic approach of R knee (surgery unspecified)<br>0SxD4ZZ Arthroscopic approach of L knee (surgery unspecified)                                        |
| Total Hip Arthroplasty                                                 | 81.51 Total hip replacement                                                        | 0SR90xx – Replacement of Right Hip Joint with Synthetic Substitute, Open Approach<br>0SRB0xx – Replacement of Left Hip Joint with Synthetic Substitute, Open Approach |
| Hemiarthroplasty                                                       | 81.52 Partial hip replacement / Hemi-arthroplasty Unipolar or bipolar femoral head | 0SRR0xx - Femoral Head Surface Right<br>0SRS0xx - Femoral Head Surface Left                                                                                           |
| Revision Hip Replacement                                               | 81.53 Revision of hip replacement not otherwise specified                          | 0SW90xx (Right Hip)<br>0SWB0xx (Left Hip)                                                                                                                             |

|                 |                        |                                                                                                                              |
|-----------------|------------------------|------------------------------------------------------------------------------------------------------------------------------|
| Hip Arthroscopy | 80.25 Arthroscopy, Hip | 0Sx94ZZ Arthroscopic approach of R hip (surgery unspecified)<br>0SxB4ZZ Arthroscopic approach of L hip (surgery unspecified) |
|-----------------|------------------------|------------------------------------------------------------------------------------------------------------------------------|

Note: x within the above ICD-10-PCS codes refer to a wildcard character, where any character could be evaluated.

**Supplementary Figure 1: Thrombotic risk in Hb SS/S $\beta^0$  patients.**

| Variable            | Hazard Ratio (95% CI) |                                                                                     | P value |
|---------------------|-----------------------|-------------------------------------------------------------------------------------|---------|
| Estimated GFR (log) | 0.54 (0.42 — 0.71)    |  | < 0.001 |
| AST (log)           | 1.68 (1.15 — 2.47)    |  | 0.007   |
| Hydroxyurea Use     | 1.73 (1.09 — 2.76)    |  | 0.021   |
| Female Sex          | 1.36 (0.94 — 1.96)    |  | 0.1     |
| Tobacco Use         | 1.15 (0.80 — 1.65)    |  | 0.5     |
| Age                 | 1.00 (0.99 — 1.02)    |  | 0.7     |

0.5 1.0 10.0

**Supplementary Figure 2: Cerebrovascular accident risk in Hb SS/S $\beta^0$  patients.**

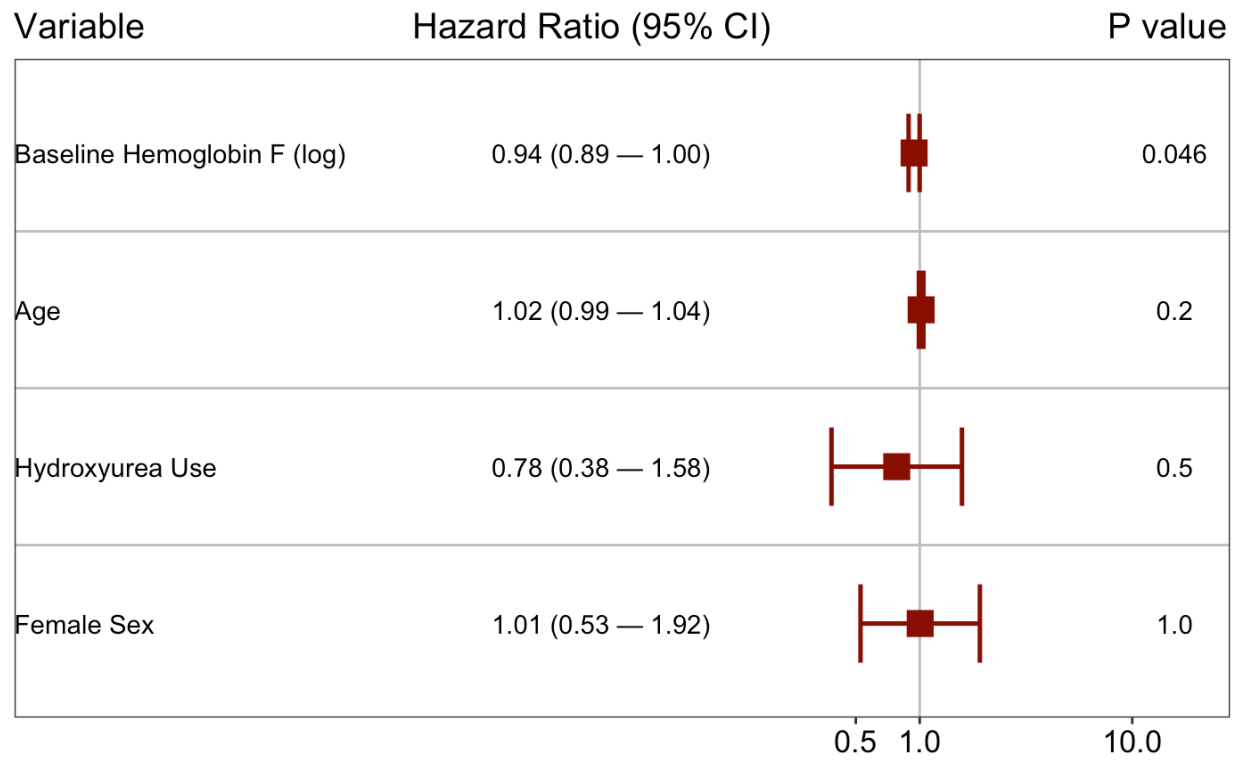

**Supplementary Figure 3: Venous thrombotic risk in Hb SS/Sp<sup>0</sup> patients.**

| Variable                     | Hazard Ratio (95% CI) |                                                                                     | P value |
|------------------------------|-----------------------|-------------------------------------------------------------------------------------|---------|
| Estimated GFR (log)          | 0.51 (0.38 — 0.68)    |  | < 0.001 |
| Hydroxyurea Use              | 2.17 (1.26 — 3.72)    |  | 0.005   |
| White Blood Cell Count (log) | 2.17 (1.25 — 3.75)    |  | 0.006   |
| Hemoglobin                   | 1.13 (0.99 — 1.28)    |  | 0.06    |
| Female Sex                   | 1.31 (0.88 — 1.94)    |  | 0.2     |
| Tobacco Use                  | 1.16 (0.79 — 1.70)    |  | 0.5     |
| Age                          | 1.01 (0.99 — 1.02)    |  | 0.5     |

0.5    1.0    10.0



**Supplementary Figure 4: Venous thrombotic risk in non-catheter related venous thrombotic events.**

| Variable                     | Hazard Ratio (95% CI) |  | P value |
|------------------------------|-----------------------|--|---------|
| Estimated GFR (log)          | 0.47 (0.35 — 0.64)    |  | < 0.001 |
| White Blood Cell Count (log) | 2.15 (1.21 — 3.83)    |  | 0.009   |
| Hydroxyurea Use              | 1.90 (1.13 — 3.20)    |  | 0.015   |
| Hemoglobin                   | 1.17 (1.02 — 1.34)    |  | 0.021   |
| HbSS/HbSβ0-thalassemia       | 1.81 (0.94 — 3.48)    |  | 0.07    |
| Age                          | 1.01 (1.00 — 1.03)    |  | 0.1     |
| Tobacco Use                  | 1.11 (0.73 — 1.68)    |  | 0.6     |
| Female Sex                   | 0.96 (0.63 — 1.46)    |  | 0.9     |

0.5 1.0 10.0
